# Supplementary material for: A pH-responsive dissociable mesoporous silica-based nanoplatform enabling efficient dual-drug co-delivery and rapid clearance for cancer therapy
Source: Royal Society of Chemistry journal article supplement (doi:10.1039/d0bm00204f), 2020-01-01
Supplement: d0bm00204f1.pdf [file d0bm00204f1.pdf]

## A pH-responsive dissociable mesoporous silica-based nanoplatform enabling efficient dual-drug co-delivery and rapid clearance for cancer therapy

Yongju He,<sup>\*a</sup> Linjie Shao,<sup>a</sup> Ibrahim Usman<sup>a</sup>, Yao Hu<sup>a</sup>, Anqiang Pan,<sup>\*a</sup> Shuquan Liang<sup>a</sup> and Hui Xu<sup>b</sup>

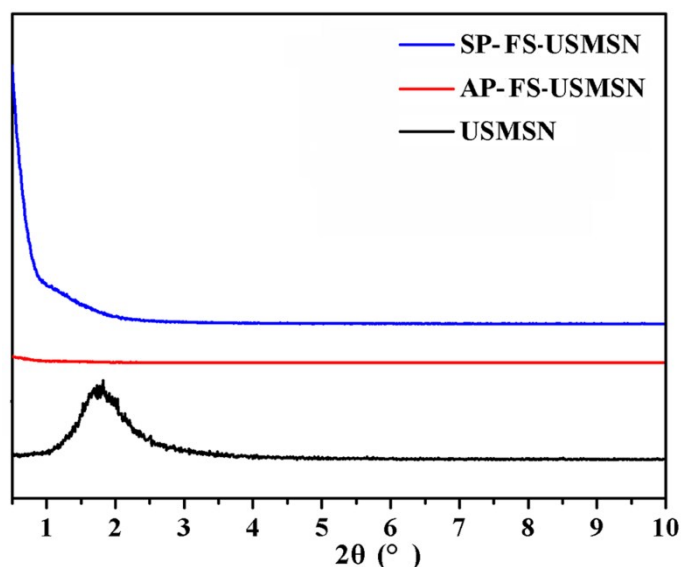

**Figure S1.** XRD patterns of SP-FS-USMSN, AP-FS-USMSN and USMSN.

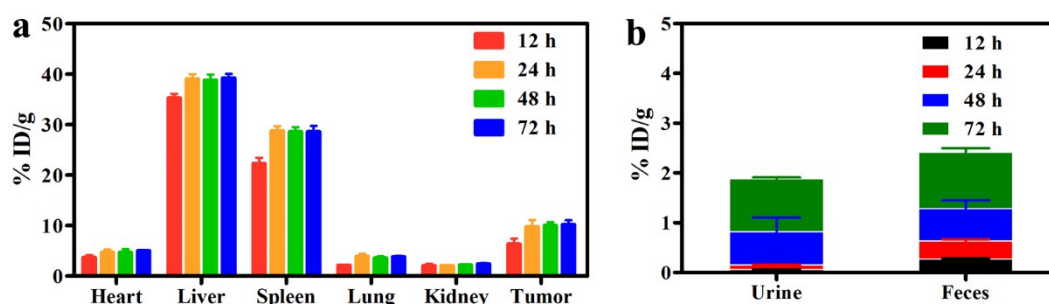

**Figure S2** In-vivo clearance. The time-dependent biodistribution of Si element (% inject dose (ID) of Si per gram of tissues) in main organs and tumor tissue of mice after i.v. injection of 100 nm-sized MSN without dissociation ability (a). Excretion profiles of Si element in mice after i.v. injection of 100 nm-sized MSN without dissociation ability (b).

<sup>a</sup> School of Material Science and Engineering, Central South University, Changsha, Hunan 410083, China

<sup>b</sup> State Key Laboratory of Natural Medicines, Jiangsu Key Laboratory of Drug Discovery for Metabolic Diseases, China Pharmaceutical University, Nanjing 210009, China

\*Corresponding Author.

Email: heyongju@csu.edu.cn & pananqiang@csu.edu.cn

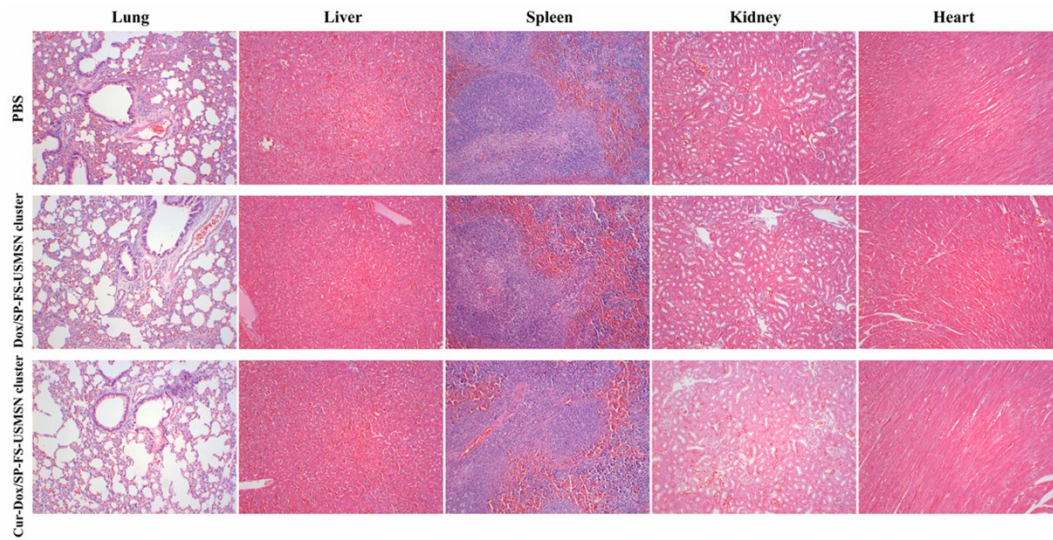

**Figure S3** Corresponding H&E stained slices obtained from the lung, liver, spleen, kidney and heart of HepG2-tumor xenograft mice on the day 15 post treatment.
